# Supplementary material
Source: PubMed Central journal article supplement (PMC7071854)
Supplement: pnas.1917814117.sapp.pdf [file pnas.1917814117.sapp.pdf]

## SI Appendix

### Supplementary Materials and Methods

#### Chromatin immunoprecipitation

Cells were grown to an OD<sub>600</sub> of 0.6 – 0.9 at 23°C, diluted to an OD<sub>600</sub> of 0.2 and shifted to 37°C for 4 hours. 30 OD cells were cross-linked with 1% formaldehyde for 30 min at room temperature. The cross-linking reaction was stopped by adding glycine to a final concentration of 125 mM. Cells were washed twice with TBS and once with spheroplasting buffer (1 M sorbitol, 100 mM KPO<sub>4</sub> and 30 mM β - mercaptoethanol) and then resuspended in spheroplast buffer with 40 unit/ml zymolyase and incubated for 30 minutes at 30°C. Spheroplasts were washed twice with spheroplast buffer and then resuspended in MNase digestion buffer (10 mM Tris–HCl [pH 7.5], 50 mM NaCl, 5 mM MgCl<sub>2</sub>, 1 mM CaCl<sub>2</sub>, 0.075% NP-40, 1 mM β - mercaptoethanol) supplemented with 40 units of micrococcal nuclease. Chromatin was digested for 30 minutes at 30°C. The digestion was stopped by placing the samples on ice and adding EDTA to a final concentration of 10 mM. 1 ml of ice-cold lysis buffer (50 mM HEPES, 5 mM EDTA, 140 mM NaCl, 1% Triton X-100 and 0.1% sodium deoxycholate) containing protease inhibitors was added to the samples. To remove cell debris, the lysate was centrifuged and the supernatant retained. From fragmented chromatin samples, aliquots were taken as an input control for the quantitative real-time PCR and as a control for the average chromatin fragment size. The remaining chromatin samples were pre-cleared with Dynabeads protein G (Thermo Fisher) for 2 h at 4°C and incubated overnight with 4 μl of α-Myc antibody. Dynabeads Protein G was subsequently added, and samples were incubated for 2 hours at 4°C. The immunoprecipitates were recovered with a magnet and washed with 1 ml of the following buffers: 1) low salt solution (0.1% (v/v) SDS, 1% (v/v) Triton X-100, 2 mM EDTA, 20 mM Tris (pH 8.1) 150 mM NaCl); 2) high salt solution (0.1% (v/v) SDS, 1% Triton (v/v) X-100, 2 mM EDTA, 20 mM Tris (pH 8.1) 500 mM NaCl); 3) LiCl buffer (0.25 M LiCl, 1% (v/v) Nonidet P-40, 1% (w/v) sodium deoxycholate, 1 mM EDTA, 10mM Tris pH 8.1), twice 1x TE. The precipitated chromatin was resuspended in 100 μl 10% Chelex 100 resin (Bio-Rad) and boiled for 10 minutes to reverse cross-linking. Protein was digested with proteinase K, and samples were then RNase-treated, and IP DNA was obtained by collecting the supernatant after centrifugation. To extract the input DNA, the samples were incubated overnight at

65°C to reverse cross-linking. They were then treated 1 h with proteinase K and 1 h with RNase following by extraction with 10% Chelex 100 resin. Samples were subsequently analyzed by quantitative real-time PCR. Primer sequences are available upon request.

### **Yeast protein extracts, co-immunoprecipitation, and Western blotting**

For Western blot analysis, 8 OD of cells were harvested, washed once with TBS and resuspended in 100µl lysis puffer (1x PBS containing 0.1% NP-40, 1mM EDTA and protease inhibitor). Cells were lysed by bead beating (using a FastPrep 5G Homogenizer MP-biomedical) for 45 s at the homogenizing intensity. Loading buffer was added to each sample, and samples were heated for 5 min to 95°C. Protein amounts equivalent to 1 OD of cells were analyzed by Western blot. Antibodies used for western blotting were α-HA (Covance MMS-101P), α-c-Myc antibody (9E10, Invitrogen) and α-H2B (Active Motif 39237).

For co-immunoprecipitation, yeast strains were grown at 23°C or 30°C and shifted for 5 h to 37°C as indicated. 200 OD yeast cells were harvested and lysed by bead-beating in 1 ml of cold IP lysis buffer (50 mM HEPES, 200mM sodium acetate, 0.25% Nonidet P-40, 1mM EDTA, 5 mM magnesium acetate, 5% glycerol, 3 mM DTT, 1 mM PMSF and protease inhibitors). The whole-cell lysate was cleared by centrifugation, and samples were normalized for their protein concentration before being used for the IP. An aliquot of 100 µl was taken as input control. 600 µl of each sample was incubated with 5µl of α-Myc overnight followed by 2 h incubation with 50 µl of Protein G dynabeads at 4°C. For immunoprecipitation of HA-tagged Cse4 using α-HA agarose, the resin was pre-washed 5 times with lysis buffer prior to overnight incubation with lysate. 70 µl of α-HA agarose (Sigma, A2095) was added to 600 µl samples. Protein-antibody-bead/agarose conjugates were washed 3 times with lysis buffer and suspended in 50µl of sample loading buffer (final concentration 62.5 mM Tris pH 6.8, 2% SDS, 10% glycerol, 5% 2-mercaptoethanol, 0.001% bromophenol blue). α-Myc antibody was obtained from Thermo scientific (MA1-980) and used at a 1:500 dilution. HA-antibody (Covance) was used at 1:250. The immunoblots were imaged on a Bio-Rad imaging system.

## Flow cytometry

FACS analysis was performed as previously described (1). Briefly, strains were grown at 23°C in YPD overnight, shifted for 5 h to the restrictive temperatures (34°C or 37°C) and grown to mid-log phase. 0.5 mL of exponentially growing cells were fixed with 70% ethanol and prepared for flow-cytometry and staining with Sytox Green dye. 100,000 cells were analyzed using a BD Accuri C6 Flow Cytometer.

**Table S1: *S. cerevisiae* strains used in this study**

| Strain  | Genotype                                                                          | Source*               |
|---------|-----------------------------------------------------------------------------------|-----------------------|
| AEY1    | <i>MATa ade2-101 his3-11,15 trp1-1 leu2-3,112 ura3-1</i><br>(W303)                |                       |
| AEY2    | AEY1, but <i>MATa</i>                                                             |                       |
| AEY4846 | <i>MATa cse4Δ::kanMX cbf1Δ::NatMX ade2 lys2</i> , W303 +<br>pRS313-3xHA-CSE4      |                       |
| AEY6115 | <i>MATa okp1-5::TRP1 cse4-R37A::HisMX ade2 lys2</i> ,<br>W303                     |                       |
| AEY6239 | AEY1 <i>yta7Δ::KanMX</i>                                                          |                       |
| AEY6253 | <i>MATa okp1-5::TRP1 yta7Δ::NatMX ade2 LYS2</i> , W303                            |                       |
| AEY6256 | <i>MATa cse4-R37A::HisMX okp1-5::TRP1 yta7Δ::KanMX</i><br><i>ade2 LYS2</i> , W303 |                       |
| AEY6295 | <i>MATa ame1-4::TRP1 yta7Δ::KanMX ade2 lys2</i> , W303                            |                       |
| AEY6327 | AEY1 <i>cnn1Δ::KanMX</i>                                                          |                       |
| AEY6329 | AEY1 <i>wip1Δ::KanMX</i>                                                          |                       |
| AEY6331 | AEY1 <i>nkp2Δ::KanMX</i>                                                          |                       |
| AEY6332 | AEY1 <i>mcm16Δ::KanMX</i>                                                         |                       |
| AEY6334 | AEY1 <i>mcm22Δ::KanMX</i>                                                         |                       |
| AEY6335 | AEY1 <i>nkp1Δ::KanMX</i>                                                          |                       |
| AEY6392 | <i>MATa dsn1-7</i> , W303                                                         | J.V. Kilmartin<br>(2) |
| AEY6393 | <i>MATa dsn1-8</i> , W303                                                         |                       |
| AEY6394 | <i>MATa nnf1-77</i> , W303                                                        |                       |
| AEY6395 | <i>MATa nuf2-61</i> , W303                                                        |                       |
|         |                                                                                   |                       |

|         |                                                                                          |  |
|---------|------------------------------------------------------------------------------------------|--|
| AEY6396 | <i>MATa nsl1-5 W303</i>                                                                  |  |
| AEY6397 | <i>MATa nsl1-6 W303</i>                                                                  |  |
| AEY6403 | <i>MATa mcm16Δ::KanMX yta7Δ::NatMX ade2 lys2, W303</i>                                   |  |
| AEY6406 | <i>MATa mcm22Δ::KanMX yta7Δ::NatMX ade2 lys2, W303</i>                                   |  |
| AEY6408 | <i>MATa wip1Δ::KanMX yta7Δ::NatMX ade2 lys2, W303</i>                                    |  |
| AEY6410 | <i>MATa cnn1Δ::KanMX yta7Δ::NatMX ade2 lys2, W303</i>                                    |  |
| AEY6411 | <i>MATa nkp2Δ::KanMX yta7Δ::NatMX ade2 lys2, W303</i>                                    |  |
| AEY6414 | <i>MATa nkp1Δ::KanMX yta7Δ::NatMX ade2 lys2, W303</i>                                    |  |
| AEY6425 | <i>MATa asf1Δ::KanMX cse4-R37A::HisMX okp1-5::TRP1<br/>ade2 lys2, W303</i>               |  |
| AEY6428 | <i>MATa ctf3Δ::KanMX yta7Δ::NatMX ade2 LYS2, W303</i>                                    |  |
| AEY6430 | <i>MATa iml3Δ::KanMX yta7Δ::NatMX ade2 LYS2, W303</i>                                    |  |
| AEY6433 | <i>MATa chl4Δ::KanMX yta7Δ::NatMX ade2 LYS2, W303</i>                                    |  |
| AEY6437 | <i>MATa ctf19Δ::KanMX yta7Δ::NatMX ade2 LYS2, W303</i>                                   |  |
| AEY6438 | <i>MATa mcm21Δ::KanMX yta7Δ::NatMX ade2 LYS2,<br/>W303</i>                               |  |
| AEY6451 | <i>MATa cbf1Δ::NatMX yta7Δ::KanMX ade2 LYS2, W303</i>                                    |  |
| AEY6452 | <i>MATa mif2-3 yta7Δ::NatMX ADE2 LYS2, W303</i>                                          |  |
| AEY6455 | <i>MATa dsn1-8 yta7Δ::NatMX ade2 LYS2, W303</i>                                          |  |
| AEY6457 | <i>MATa nuf2-61 yta7Δ::NatMX ade2 LYS2, W303</i>                                         |  |
| AEY6459 | <i>MATa spc25-1 yta7Δ::NatMX ade2 LYS2, W303</i>                                         |  |
| AEY6461 | <i>MATa mtw1-11 yta7Δ::NatMX ade2 LYS2, W303</i>                                         |  |
| AEY6463 | <i>MATa nsl1-6 yta7Δ::NatMX ade2 LYS2, W303</i>                                          |  |
| AEY6471 | <i>MATa dsn1-7 yta7Δ::NatMX ade2 LYS2, W303</i>                                          |  |
| AEY6474 | <i>MATa cep3-2 yta7Δ::NatMX ade2 LYS2, W303</i>                                          |  |
| AEY6475 | <i>MATa ndc10-2 yta7Δ::NatMX ade2 LYS2, W303</i>                                         |  |
| AEY6488 | <i>MATa cse4Δ::kanMX cbf1Δ::NatMX yta7Δ::URAMX<br/>ade2 lys2, W303+ pRS313-3xHA-CSE4</i> |  |
| AEY6494 | <i>MATa ndc10-1 yta7Δ::NatMX ade2 lys2, W303</i>                                         |  |
| AEY6497 | <i>MATa ndc80-1 yta7Δ::NatMX ade2 lys2, W303</i>                                         |  |
| AEY6499 | <i>MATa spc105-4 yta7Δ::NatMX ade2 lys2, W303</i>                                        |  |
| AEY6501 | <i>MATa spc24-1 yta7Δ::NatMX ade2 lys2, W303</i>                                         |  |

|                      |                                                                                                                  |                 |
|----------------------|------------------------------------------------------------------------------------------------------------------|-----------------|
| AEY6502              | <i>MATa nnf1-77 yta7Δ::NatMX ade2 lys2</i> , W303                                                                |                 |
| AEY6520              | <i>MATa ctf13-3 yta7Δ::NatMX ade2 lys2</i> , W303                                                                |                 |
| AEY6521              | <i>MATa nsl1-5 yta7Δ::NatMX ade2 lys2</i> , W303                                                                 |                 |
| AEY6533              | AEY1 <i>YTA7-9xmyc::KanMX</i>                                                                                    |                 |
| AEY6536              | <i>MATa YTA7-9xmycKanMX cse4Δ::NatMX ade2 lys2</i> , W303 + pRS426-3xHA-CSE4                                     |                 |
| AEY6542              | <i>MATa cep3-1 yta7Δ::NatMX ade2 lys2</i> , W303                                                                 |                 |
| AEY2546              | <i>MATa cse4Δ::kanMX yta7Δ::NatMX ade2 lys2</i> , W303 + pPY20-cse4-103                                          |                 |
| AEY6552 <sup>#</sup> | <i>scm3-1(ts)-9Myc::kITRP1 ura3 leu2 his3</i> (LLY002-2)                                                         | E. Schiebel (3) |
| AEY6560 <sup>#</sup> | <i>MATa yta7Δ::NatMX scm3-1(ts)-9Myc-kITRP1 ade2-101 his3-11,15 trp1-1 leu2-3,112 ura3-lys2</i>                  |                 |
| AEY6573              | <i>MATa cse4Δ::kanMX chl4Δ::KanMX ADE2 LYS2</i> , W303 + pRS313-3xHA-CSE4                                        |                 |
| AEY6577              | <i>MATa cse4Δ::kanMX chl4Δ::KanMX yta7Δ::NatMX ADE2 LYS2</i> , W303 + pRS313-3xHA-CSE4                           |                 |
| AEY6580              | <i>MATa cbf1Δ::NatMX OKP1-9xMyc::KanMX ade2 lys2</i> , W303                                                      |                 |
| AEY6621              | <i>MATa cse4Δ::kanMX okp1-5::TRP1 ADE2 lys2</i> , W303 + pRS313-3xHA-CSE4                                        |                 |
| AEY6624              | <i>MATa cse4Δ::kanMX yta7Δ:: NatMX okp1-5::TRP1 ade2 lys2</i> , W303 + pRS313-3xHA-CSE4                          |                 |
| AEY6649              | <i>MATa chl4Δ::KanMX yta7Δ::NatMX hht2-hhf2Δ::HIS3 ade2 LYS2</i> , W303                                          |                 |
| AEY6669              | <i>MATa cbf1Δ::NatMX OKP1-9xMyc::KanMX yta7Δ::URAMX ade2 lys2</i> , W303                                         |                 |
| AEY6678              | <i>MATa cbf1Δ::NatMX hht1-hhf1Δ::LEU2 hht2-hhf2Δ::HIS3 ade2 lys2</i> , W303 + pNOY439-HHF2 myc-HHT2              |                 |
| AEY6679              | <i>MATa cbf1Δ::NatMX yta7Δ::URAMX hht1-hhf1Δ::LEU2 hht2-hhf2Δ::HIS3 ade2 lys2</i> , W303 + pNOY439-HHF2 myc-HHT2 |                 |
| AEY6734              | AEY1 <i>SCM3-6xHA-KanMX</i>                                                                                      |                 |
| AEY6746              | <i>MATa YTA7-9xmycKanMX SCM3-6xHA::KanMX ADE2 LYS2</i> , W303                                                    |                 |
| AEY6750              | <i>MATa cse4Δ::kanMX ade2 lys2 GALSpr-SCM3::natNT2</i> ,                                                         |                 |

|         |                                                                                                                                                      |  |
|---------|------------------------------------------------------------------------------------------------------------------------------------------------------|--|
|         | W303 pRS313-3xHA-CSE4                                                                                                                                |  |
| AEY6672 | <i>MATa hht1-hhf1Δ::LEU2 hht2-hhf2Δ::HIS3 ade2 lys2Δ::His4 his3-11,15 trp1-1 leu2-3,112 ura3-1 can1-100 + pNOY439 (CEN6 ARS4-TRP1 HHF2 MYC-HHT2)</i> |  |
| AEY6682 | <i>MATα yta7Δ::UraMX hht1-hhf1Δ::LEU2 hht2-hhf2Δ::HIS3 ade2 lys2, W303 + pNOY439 (CEN6 ARS4-TRP1 HHF2 MYC-HHT2)</i>                                  |  |
| AEY6687 | <i>MATa cse4Δ::kanMX ade2 lys2, W303 + pRS313-3xHA-CSE4</i>                                                                                          |  |
| AEY6692 | <i>MATa cse4Δ::kanMX yta7::URAMX ade2 lys2, W303 + pRS313-3xHA-CSE4</i>                                                                              |  |
| AEY6801 | <i>MATa GALSpr::natNT2::SCM3-6xHA::KanMX ade2 LYS2 CSE4-13myc::URA3, W303</i>                                                                        |  |

\*Unless indicated otherwise, strains were from the laboratory collection or were generated in the course of this study. All strains except those marked with # are isogenic to W303.

**Table S2: Plasmids used in this study**

| Plasmid | Description                         | Source*          |
|---------|-------------------------------------|------------------|
| pAE615  | pRS313-3xHA-CSE4                    | (4)              |
| pAE1771 | <i>TRP1, ARS1, CEN6-CDE1Δ (d66)</i> | P. Hieter<br>(5) |
| pAE2684 | pRS316-YTA7                         | J. Rine<br>(6)   |
| pAE2685 | pRS316-yta7-K460A                   |                  |
| pAE2686 | pRS316-yta7-E519Q                   |                  |
| pAE2786 | pRS326-YTA7                         |                  |
| pAE2904 | pNOY439-HHF2 myc-HHT2               | A. Nourani (7)   |

\*Unless indicated otherwise, plasmids were from the laboratory collection or were generated in the course of this study.

## Supplementary figures

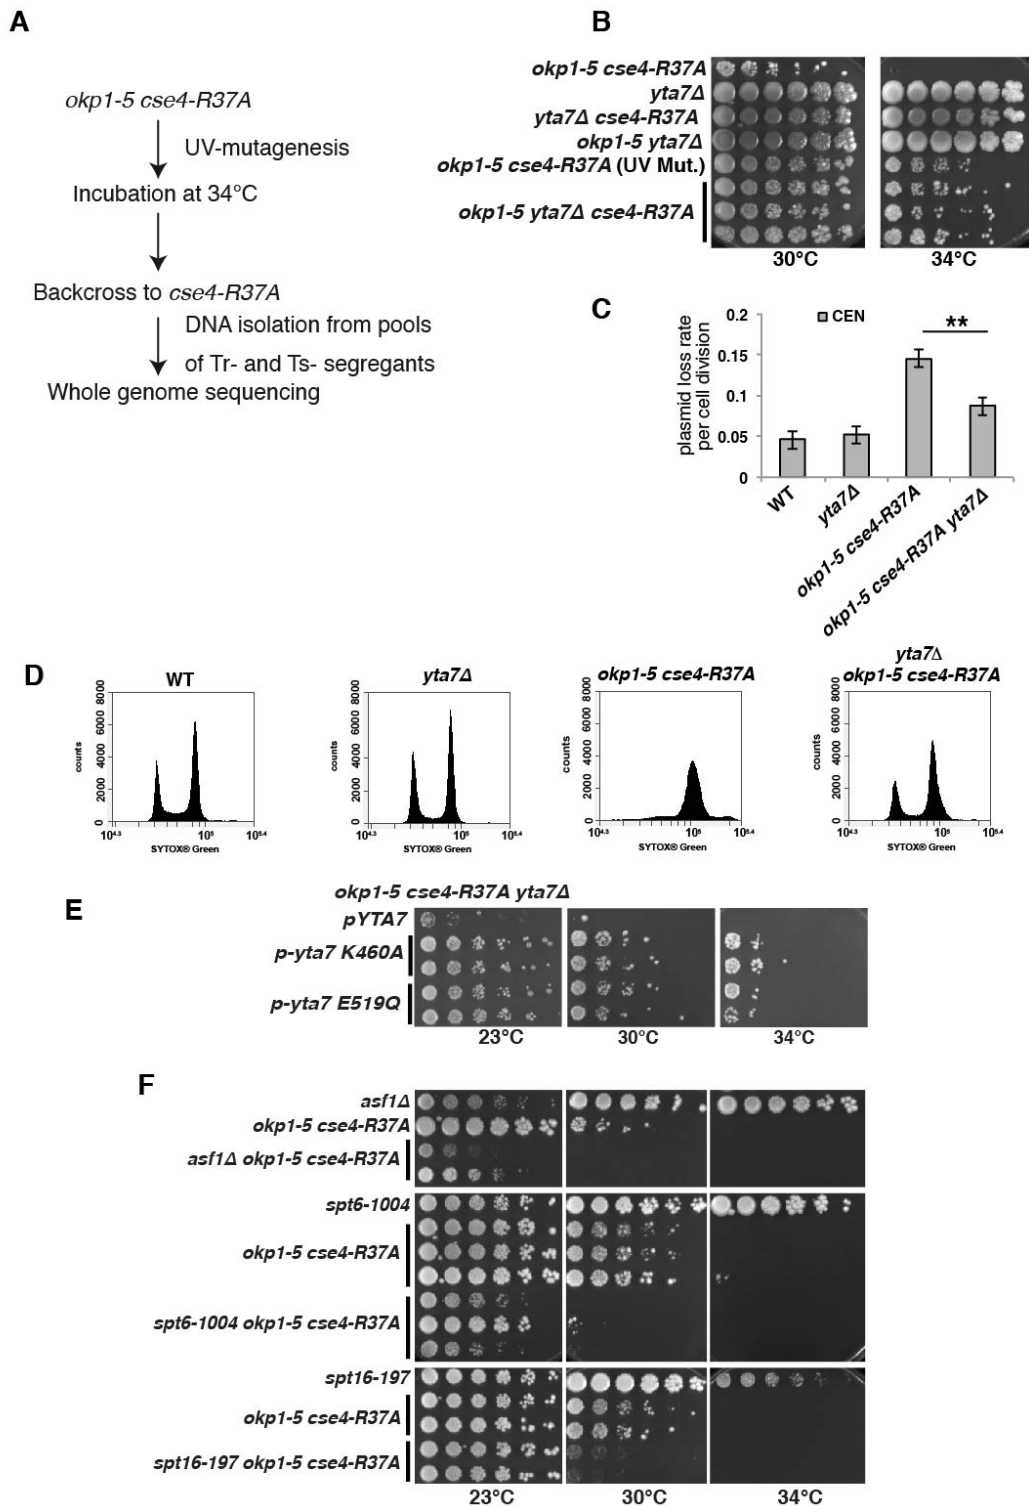

**Fig. S1.** *yta7Δ* suppressed the synthetic growth defects of mutation of Cse4-R37. (A) Schematic for the identification of extragenic suppressors of the growth defect of *okp1-5 cse4-R37A*. To eliminate any unlinked mutations, the temperature-resistant suppressor mutants were backcrossed to an unmutagenized parental strain, and the causative mutations were identified using whole-genome sequencing of pooled segregants. (B) *yta7Δ* suppressed the temperature-sensitive growth defect of *okp1-5*

*cse4-R37A*. Serial dilutions of the indicated strains were spotted on YPD medium and incubated for 3 days at the respective temperatures. The original *yta7* mutant from the suppressor screen is indicated as “UV Mut.”. (C) *yta7* $\Delta$  suppressed the plasmid maintenance defect of *okp1-5 cse4-R37A*. The loss rate of a CEN plasmid was measured in the indicated strains. Error bars indicate SD of at least three independent transformants. \*\*,  $P < 0.01$ . (D) *yta7* $\Delta$  partially suppressed the G2/M arrest of *okp1-5 cse4-R37A* at the restrictive temperature. Cells were grown to early logarithmic phase at 23°C and shifted to 34°C for 5 h. Cellular DNA content was measured by FACS analysis using Sytox Green dye. (E) Mutations in the Walker A (K460A) or Walker B (E519Q) motifs of the AAA<sup>+</sup> ATPase domain of Yta7 caused a loss of Yta7 function in *okp1-5 cse4-R37A*. Representation as in B. (F) Mutations in the genes encoding the histone chaperones Spt16, Spt6, and Asf1 (*spt16-197*, *spt6-1004*, and *asf1* $\Delta$ ) enhanced the growth defect of *okp1-5 cse4-R37A*. Representation as in B.



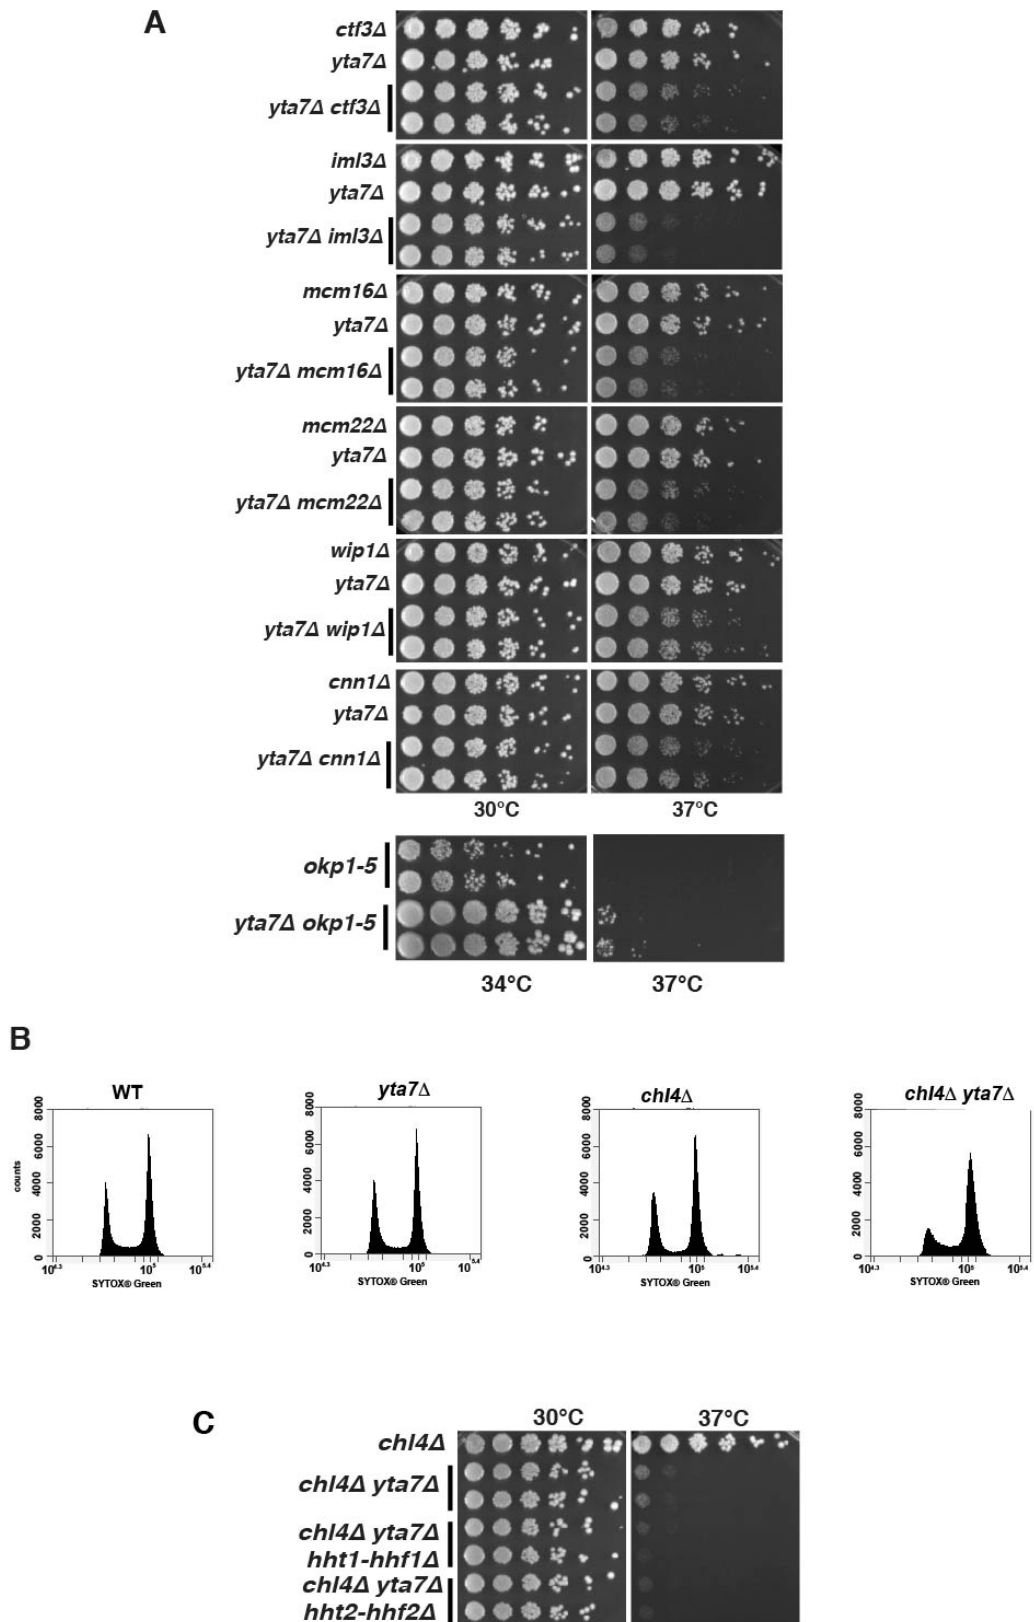

**Fig. S2.** *yta7Δ* causes defects in centromere function and cell-cycle progression. The synthetic growth defects of *yta7Δ* were caused by impairment of cell cycle progression. (A) Synthetic genetic interactions of *yta7Δ* with mutations in genes

encoding kinetochore components. Serial dilutions of the indicated strains were spotted on full medium and incubated for 3 days at indicated temperatures. (B) *yta7Δ* causes a G2/M cell cycle arrest in *chl4Δ* at the restrictive temperature. Cells were grown to early logarithmic phase at 23°C and shifted to 37°C for 5 h. Cellular DNA content was measured by FACS analysis using Sytox Green dye. (C) Decreased dosage of histone H3 and H4 did not suppress the defect caused by *yta7Δ* in *chl4Δ*, indicating that the effect of *yta7Δ* at centromeres is not due to increased levels of H3 and H4. Representation as in A.

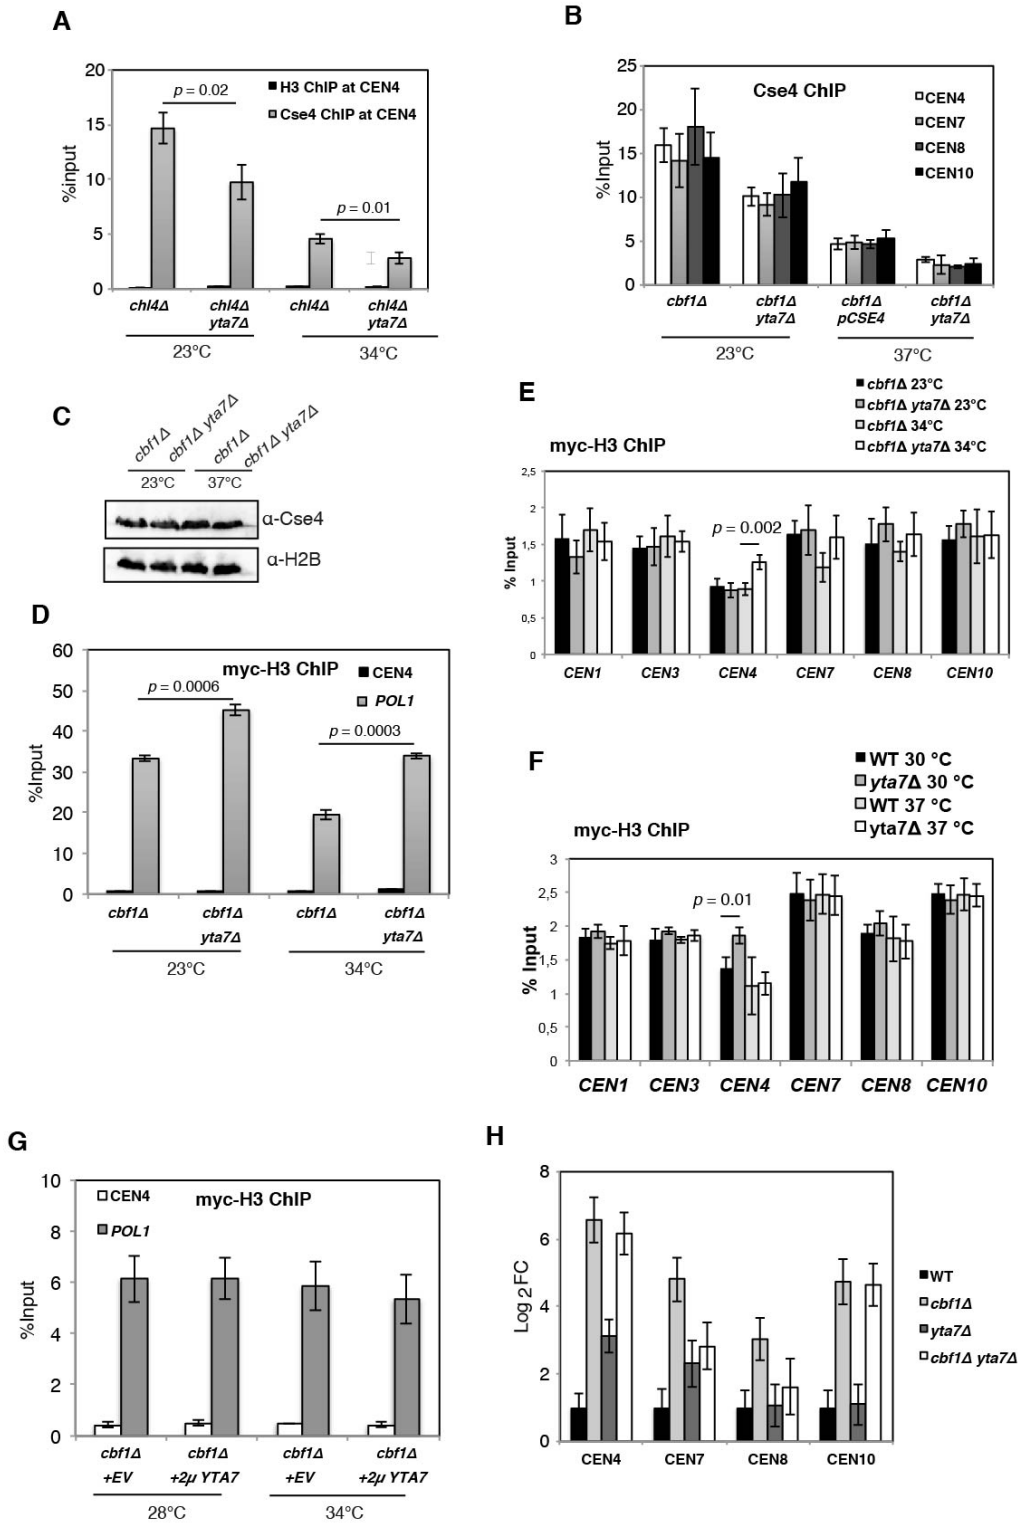

**Fig. S3.** Yta7 is required for proper localization of Cse4 to the centromere. (A) ChIP shows a significant decrease in Cse4 association with *CEN4* in the absence of Yta7 in *cbf1Δ* cells. The  $\alpha$ -H3 antibody is used in ChIP analysis as a control. Analysis as in Fig. 2A. (B) A reduction in centromere-bound Cse4 at *CEN4*, *CEN7*, *CEN8*, and *CEN10* as detected by ChIP in *yta7Δ cbf1Δ* cells at both the permissive and restrictive temperatures. (C) *yta7Δ* did not reduce bulk Cse4 levels in *cbf1Δ* cells.

Western blot analysis of the amounts of HA-Cse4 and histone H2B (loading control) in whole-cell extracts. (D) *yta7Δ* caused increased levels of H3 at a non-centromeric region (*POL1*). ChIP was performed as in Fig. 2B. (E) *yta7Δ* caused a mild increase of H3 at *CEN4* in *cbf1Δ* cells at the restrictive temperature, but not at several other centromeres. (F) *yta7Δ* cells had mildly increased H3 levels at *CEN4* at 30°C, but not at other centromeres, at 30°C. (G) *YTA7* overexpression did not increase H3 levels at a non-centromeric site (*POL1*). The experiment was performed as in Fig. 2F. (H) *yta7Δ* did not cause increased transcription through the centromere in *cbf1Δ*. RT-qPCR analysis of *cenRNA4*, *cenRNA7*, *cenRNA8*, and *cenRNA10* in the deletion mutants is shown relative to the WT. Means  $\pm$  SD are given,  $n = 3$  ( $P$ -values by Student's  $t$ -test).

Data information: (A,B, D - G) Yeast cells were grown at permissive temperature or were shifted to restrictive temperature for 4 hours before ChIP. Means  $\pm$  SD,  $n = 3$ .

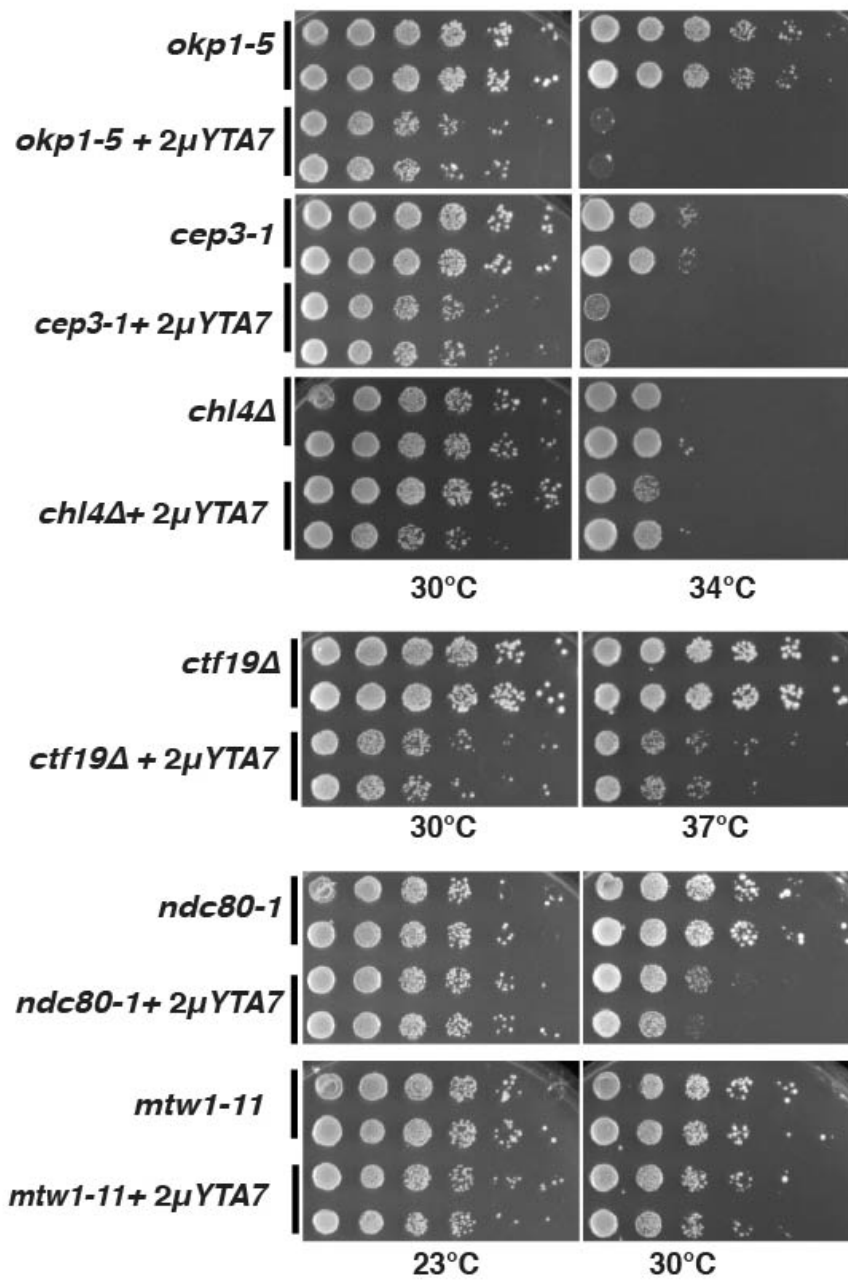

**Fig. S4.** Overexpression of *YTA7* causes a growth defect in kinetochore mutants. *YTA7* on a high-copy 2μ plasmid and a control plasmid were introduced into the indicated strains, and serial dilutions of transformants were spotted on selective medium and grown at indicated temperatures for 3 days.

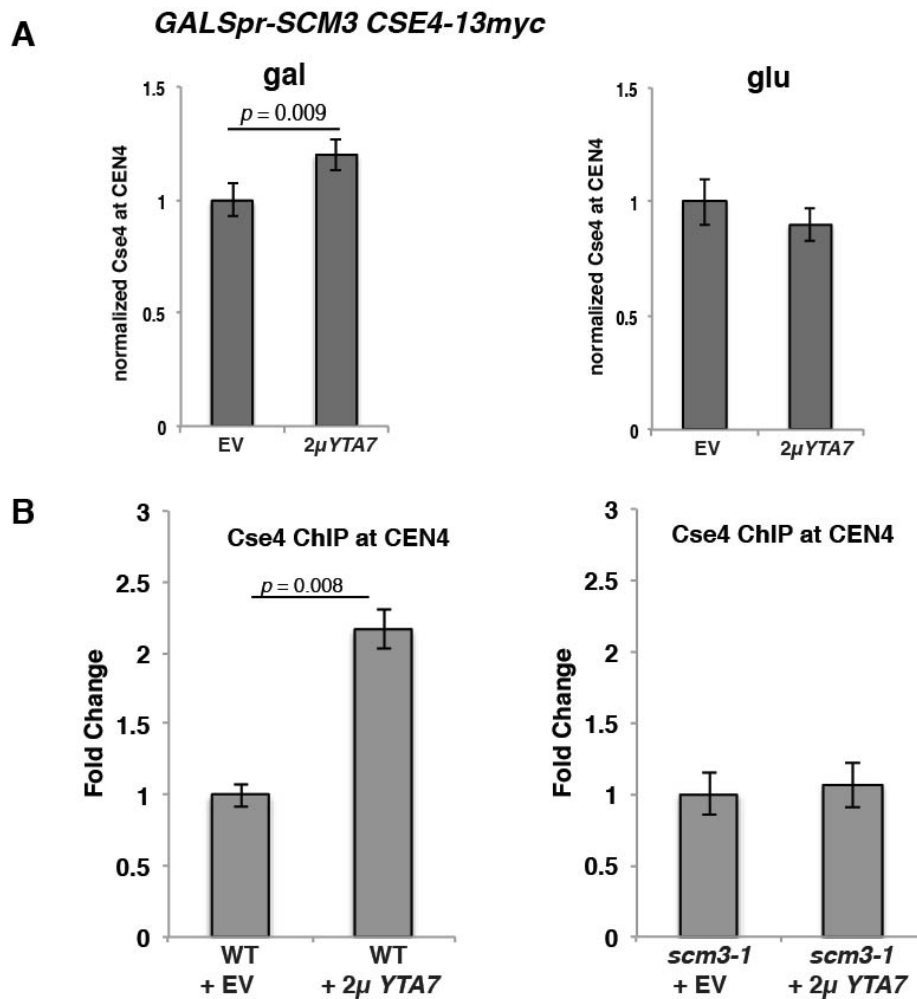

**Fig. S5.** *YTA7*-dependent Cse4 deposition at the centromere requires functional Scm3. (A) ChIP of 13myc-tagged Cse4 was conducted in cells with *GALSpr-SCM3* and *YTA7* overexpression (2 $\mu$  *YTA7*) or vector control (EV). Cells were grown either in galactose (*SCM3* on, left) or glucose (*SCM3* off, right), and 13myc-Cse4 was precipitated with  $\alpha$ -myc agarose. Values are normalized to the vector control. Means  $\pm$  SD,  $n = 3$  ( $P$ -values by Student's *t*-test) are shown. (B) ChIP of HA-Cse4 was conducted in wild-type (WT, left) or *scm3-1* cells and *YTA7* overexpression (2 $\mu$  *YTA7*) or vector control (EV). Cells were grown 34°C, and HA-Cse4 was precipitated with  $\alpha$ -HA agarose. Values are normalized to the vector control. Means  $\pm$  SD,  $n = 3$  ( $P$ -values by Student's *t*-test) are shown.

## Supplementary references

1. Anedchenko EA, *et al.* (2019) The kinetochore module Okp1(CENP-Q)/Ame1(CENP-U) is a reader for N-terminal modifications on the centromeric histone Cse4(CENP-A). *EMBO J* 38(1).
2. Nekrasov VS, Smith MA, Peak-Chew S, & Kilmartin JV (2003) Interactions between centromere complexes in *Saccharomyces cerevisiae*. *Mol Biol Cell* 14(12):4931-4946.
3. Luconi L, Araki Y, Erlemann S, & Schiebel E (2011) The CENP-A chaperone Scm3 becomes enriched at kinetochores in anaphase independently of CENP-A incorporation. *Cell cycle* 10(19):3369-3378.
4. Samel A, Cuomo A, Bonaldi T, & Ehrenhofer-Murray AE (2012) Methylation of CenH3 arginine 37 regulates kinetochore integrity and chromosome segregation. *Proc Natl Acad Sci U S A* 109(23):9029-9034.
5. Sikorski RS & Hieter P (1989) A system of shuttle vectors and yeast host strains designed for efficient manipulation of DNA in *Saccharomyces cerevisiae*. *Genetics* 122(1):19-27.
6. Lombardi LM, Ellahi A, & Rine J (2011) Direct regulation of nucleosome density by the conserved AAA-ATPase Yta7. *Proc Natl Acad Sci U S A* 108(49):E1302-1311.
7. Rufiange A, Jacques PE, Bhat W, Robert F, & Nourani A (2007) Genome-wide replication-independent histone H3 exchange occurs predominantly at promoters and implicates H3 K56 acetylation and Asf1. *Mol Cell* 27(3):393-405.
